# Supplementary material for: The changing hydrology of a dammed Amazon
Source: PubMed Central journal article supplement — Sci Adv. 2017 Nov 1;3(11):e1700611. doi: 10.1126/sciadv.1700611 (PMC5665594; doi:10.1126/sciadv.1700611), 2017-11-01
Supplement: 1700611_SM.pdf [file 1700611_SM.pdf]

## Supplementary Materials for **The changing hydrology of a dammed Amazon**

Kelsie Timpe and David Kaplan

Published 1 November 2017, *Sci. Adv.* **3**, e1700611 (2017)

DOI: 10.1126/sciadv.1700611

### **This PDF file includes:**

- table S1. Hydroelectric dams analyzed with supporting information.
- table S2. Streamflow stations used for IHA analysis.
- table S3. Stations used in the LOR analysis.
- table S4. Stations used in the IHA analysis of individual dams, with supporting information.
- table S5. Stations used in the IHA analysis of multiple dams in the Amazon and Paraná basins.
- table S6. Stations used in the IHA analysis of multiple dams in the Tocantins basin.
- table S7. IHA results for streamflow stations in the individual dams analysis.
- table S8. IHA results for streamflow stations in the multiple dams analysis.

**table S1. Hydroelectric dams analyzed with supporting information. NA signifies data not available.**

| Dam Name                          | River     | Watershed             | Lat. (deg.) | Lon. (deg.) | Elevation (masl) | Production (KW) | Reservoir Size (km <sup>2</sup> ) | Construction Start Year | Reservoir Fill Start Year | Operation Date | IHA Analysis Group |
|-----------------------------------|-----------|-----------------------|-------------|-------------|------------------|-----------------|-----------------------------------|-------------------------|---------------------------|----------------|--------------------|
| Antônio Brennand                  | Jauru     | Paraná                | -15.047     | -58.752     | 421              | 21960           | NA                                | NA                      | NA                        | 9/13/02        | Cumulative         |
| Aquarius                          | Correntes | Amazon                | -17.621     | -54.89      | 253              | 4200            | NA                                | NA                      | NA                        | 9/19/06        | Cumulative         |
| Balbina                           | Uatumã    | Amazon                | -1.915      | -59.473     | 32               | 249750          | 4438                              | 1977                    | 1987                      | 2/20/89        | Individual         |
| Baruíto                           | Sangue    | Amazon                | -13.318     | -57.597     | 338              | 18300           | 1                                 | NA                      | NA                        | 4/29/03        | Cumulative         |
| Cachoeira do Lavrinha             | das Almas | Tocantins/ Araguaia   | -15.516     | -49.485     | 562              | 3010            | NA                                | NA                      | NA                        | 4/16/04        | Individual         |
| Cana Brava                        | Tocantins | Tocantins/ Araguaia   | -13.399     | -48.143     | 309              | 450000          | 140                               | 1999                    | NA                        | 5/22/02        | Cumulative         |
| Coaracy Nunes                     | Araguari  | North Atlantic Basins | 0.904       | -51.259     | 47               | 76952           | 30                                | 1967                    | 1975                      | 12/30/75       | Individual         |
| Dardanelos                        | Aripuanã  | Amazon                | -10.163     | -59.464     | 189              | 261000          | 0                                 | 2007                    | NA                        | 8/9/11         | Cumulative         |
| Estreito                          | Tocantins | Tocantins/ Araguaia   | -6.587      | -47.459     | 165              | 1087000         | 636                               | 2007                    | 2010                      | 4/29/11        | Cumulative         |
| Faxinal I                         | Aripuanã  | Amazon                | -10.165     | -59.447     | 189              | 2788            | NA                                | NA                      | NA                        | 3/13/97        | Cumulative         |
| Figueirópolis                     | Jauru     | Paraná                | -15.393     | -58.638     | 198              | 19410           | 7                                 | NA                      | NA                        | 9/28/10        | Cumulative         |
| Garganta da Jararaca              | Sangue    | Amazon                | -13.391     | -57.624     | 396              | 29300           | 2                                 | NA                      | NA                        | 11/28/06       | Cumulative         |
| Graça Brennand                    | Juba      | Paraná                | -14.793     | -57.967     | 251              | 27400           | 6                                 | NA                      | NA                        | 6/28/08        | Cumulative         |
| Guaporé                           | Guaporé   | Amazon                | -15.123     | -58.964     | 482              | 124200          | 5                                 | 2001                    | 2002                      | 4/8/03         | Individual         |
| Indiavaí                          | Jauru     | Paraná                | -15.255     | -58.716     | 244              | 28000           | 0                                 | NA                      | NA                        | 8/1/03         | Cumulative         |
| Itiquira (Casas de Forças I e II) | Itiquira  | Paraná                | -17.09      | -54.83      | 416              | 156000          | 4                                 | 1998                    | 2002                      | 11/6/02        | Both               |
| Jauru                             | Jauru     | Paraná                | -15.235     | -58.727     | 369              | 121500          | 5                                 | 2000                    | 2002                      | 6/6/03         | Cumulative         |
| Juba I                            | Juba      | Paraná                | -14.748     | -58.074     | 360              | 42000           | 1                                 | 1992                    | 1995                      | 11/10/95       | Cumulative         |
| Juba II                           | Juba      | Paraná                | -14.756     | -58.023     | 288              | 42000           | 3                                 | 1993                    | 1995                      | 8/16/95        | Cumulative         |
| Lajeado (Luís Eduardo Magalhães)  | Tocantins | Tocantins/ Araguaia   | -9.757      | -48.371     | 189              | 902500          | 630                               | 1998                    | 2001                      | 12/1/01        | Both               |
| Manso                             | Manso     | Paraná                | -14.874     | -55.785     | 268              | 210900          | 402                               | 1988                    | 2000                      | 11/29/00       | Individual         |
| Ombreiras                         | Jauru     | Paraná                | -15.1       | -58.733     | 402              | 26000           | 3                                 | NA                      | NA                        | 7/23/05        | Cumulative         |
| Pampeana                          | Juba      | Paraná                | -14.83      | -57.912     | 213              | 27990           | 4                                 | NA                      | NA                        | 5/14/09        | Cumulative         |
| Peixe Angical                     | Tocantins | Tocantins/ Araguaia   | -12.239     | -48.382     | 244              | 498750          | 318                               | 2002                    | 2006                      | 6/27/06        | Cumulative         |

|                |              |                        |         |         |     |         |      |      |      |          |            |
|----------------|--------------|------------------------|---------|---------|-----|---------|------|------|------|----------|------------|
| Ponte de Pedra | Correntes    | Paraná                 | -17.61  | -54.827 | 396 | 176100  | 16   | 2001 | 2004 | 7/19/05  | Cumulative |
| Rio Branco     | Branco       | Amazon                 | -11.906 | -62.181 | 209 | 7140    | NA   | NA   | NA   | 12/31/04 | Individual |
| Salto          | Jauru        | Paraná                 | -15.288 | -58.711 | 219 | 19000   | 1    | NA   | NA   | 12/29/07 | Cumulative |
| Santa Gabriela | Correntes    | Paraná                 | -17.538 | -54.433 | 466 | 24000   | 1    | NA   | NA   | 9/18/09  | Cumulative |
| Santa Lúcia II | Juruena      | Amazon                 | -13.552 | -59.037 | 475 | 7600    | NA   | NA   | NA   | 4/14/03  | Individual |
| São Domingos   | São Domingos | Tocantins/<br>Araguaia | -13.407 | -46.344 | 640 | 14336   | NA   | NA   | NA   | 1/1/91   | Individual |
| São Salvador   | Tocantins    | Tocantins/<br>Araguaia | -12.81  | -48.239 | 264 | 243200  | 100  | 2006 | 2008 | 8/6/09   | Cumulative |
| Serra da Mesa  | Tocantins    | Tocantins/<br>Araguaia | -13.835 | -48.301 | 451 | 1275000 | 1254 | 1986 | 1996 | 4/30/98  | Both       |
| Tucuruí        | Tocantins    | Tocantins/<br>Araguaia | -3.832  | -49.652 | 55  | 8535000 | 3513 | 1975 | 1984 | 12/30/84 | Both       |

---

**table S2. Streamflow stations used for IHA analysis.**

| Station Name                    | River        | Watershed             | Lat. (deg.) | Lon. (deg.) | Mean Flow (m <sup>3</sup> /s) | Region                | Data Span | Data Gaps (if any)               |
|---------------------------------|--------------|-----------------------|-------------|-------------|-------------------------------|-----------------------|-----------|----------------------------------|
| Água Suja                       | Jauru        | Paraná                | -15.5       | -58.6       | 93                            | Southwest Cerrado     | 1980-2015 | 1988-1993                        |
| AHE São Félix - Mira B/S. Félix | Tocantins    | Tocantins/ Araguaia   | -13.53      | -48.14      | 793                           | Central Cerrado       | 1975-2006 | 1996                             |
| Araguatins                      | Araguaia     | Tocantins/ Araguaia   | -5.63       | -48.13      | 6399                          | Northern Cerrado      | 1975-2015 | none                             |
| Cáceres (DNPVN)                 | Paraguai     | Paraná                | -16.1       | -57.7       | 587                           | Pantanal              | 1966-2015 | none                             |
| Cachoeira Do Cachimbo           | Branco       | Amazon                | -11.93      | -62.15      | 37                            | Southwestern Lowlands | 1993-2014 | 1996, 2011                       |
| Cachoeira Morena                | Uatuma       | Amazon                | -2.11       | -59.34      | 688                           | Northern Lowlands     | 1973-2011 | 1987-1990,20 08, 2009            |
| Carolina                        | Tocantins    | Tocantins/ Araguaia   | -7.34       | -47.47      | 3799                          | Central Cerrado       | 1962-2011 | none                             |
| Ceres                           | das Almas    | Tocantins/ Araguaia   | -15.28      | -49.55      | 166                           | South Central Cerrado | 1965-2015 | 1990                             |
| Descarreto                      | Tocantins    | Tocantins/ Araguaia   | -5.79       | -47.47      | 4495                          | Northern Cerrado      | 1955-2015 | 1956-1958, 1964                  |
| Estrada BR-163                  | Correntes    | Paraná                | -17.6       | -54.8       | 62                            | Southwest Cerrado     | 1970-2015 | 1981-1984, 1987- 1994            |
| Fazenda Angical                 | Tocantins    | Tocantins/ Araguaia   | -12.25      | -48.35      | 1668                          | Central Cerrado       | 1975-2005 | none                             |
| Fazenda Lobeira                 | Manuel Alves | Tocantins/ Araguaia   | -11.53      | -48.29      | 187                           | Central Cerrado       | 1970-2015 | 1988, 2006, 2007                 |
| Fazenda Raizama (Coimbra) - F6  | Manso        | Paraná                | -14.9       | -55.9       | 186                           | Southwest Cerrado     | 1982-2015 | 1990-1993, 1999, 2000, 2005-2007 |
| Fazenda Tombador                | do Sangue    | Amazon                | -11.72      | -58.05      | 521                           | Southern Highlands    | 1985-2014 | 1997, 1998, 2007                 |
| Fazenda Tucunaré                | Juruena      | Amazon                | -13.46      | -59         | 143                           | Southern Highlands    | 1995-2014 | none                             |
| Fazenda Veneza                  | São Domingos | Tocantins/ Araguaia   | -13.5       | -46.78      | 44                            | Central Cerrado       | 1976-2014 | 1989-1991, 2006, 2007            |
| Humboldt                        | Aripuanã     | Amazon                | -10.17      | -59.47      | 339                           | Southern Highlands    | 1983-2014 | 1989-1991, 1993, 1994            |
| Itiquira                        | Itiquira     | Paraná                | -17.2       | -54.2       | 63                            | Southwest Cerrado     | 1971-2015 | none                             |
| Itupiranga                      | Tocantins    | Tocantins/ Araguaia   | -5.13       | -49.32      | 10877                         | Northern Cerrado      | 1970-2015 | none                             |
| Jacinto                         | Santa Tereza | Tocantins/ Araguaia   | -11.98      | -48.66      | 159                           | Central Cerrado       | 1972-2015 | 1986-1994, 2006, 2007            |
| Jaraguá                         | Das Almas    | Tocantins/ Araguaia   | -15.72      | -49.33      | 33                            | Central Cerrado       | 1965-2015 | 1995, 1996, 2013                 |
| Leônidas (Bambu)                | Araguari     | North Atlantic Basins | 0.79        | -51.61      | 505                           | East Lowlands         | 1952-2014 | 1957-1972                        |
| Marabá                          | Tocantins    | Tocantins/ Araguaia   | -5.34       | -49.12      | 10695                         | Northern Cerrado      | 1972-2015 | 2006, 2007                       |
| Mato Grosso                     | Guaporé      | Amazon                | -15.01      | -59.96      | 131                           | Southern Highlands    | 1977-2014 | 1992, 2002                       |

|                                       |           |                          |        |        |       |                    |           |                                |
|---------------------------------------|-----------|--------------------------|--------|--------|-------|--------------------|-----------|--------------------------------|
| Miracema do Tocantins                 | Tocantins | Tocantins/<br>Araguaia   | -9.57  | -48.38 | 2300  | Central Cerrado    | 1970-2015 | none                           |
| Peixe                                 | Tocantins | Tocantins/<br>Araguaia   | -12.02 | -48.53 | 1681  | Central Cerrado    | 1971-2015 | 2006, 2007                     |
| Pontes e Lacerda                      | Guaporé   | Amazon                   | -15.22 | -59.35 | 57    | Southern Highlands | 1971-2014 | 1987, 1991, 1992               |
| Porto Esperidião                      | Jauru     | Paraná                   | -15.9  | -58.5  | 108   | Southwest Cerrado  | 1966-2015 | 1991, 1992                     |
| Porto Nacional                        | Tocantins | Tocantins/<br>Araguaia   | -10.7  | -48.42 | 2172  | Central Cerrado    | 1931-2007 | 1935, 1937-1948, 1995,<br>1996 |
| Porto Platon                          | Araguari  | North Atlantic<br>Basins | 0.71   | -51.44 | 959   | East Lowlands      | 1952-2014 | 1957-1972                      |
| Rosário Oeste                         | Cuiabá    | Paraná                   | -14.8  | -56.4  | 302   | Southwest Cerrado  | 1966-2013 | 1992-1994, 2008-2010           |
| São Jerônimo                          | Piquiri   | Paraná                   | -17.2  | -56    | 255   | Southwest Cerrado  | 1968-2015 | 1987- 1992                     |
| São José do Piquiri                   | Piquiri   | Paraná                   | -17.3  | -56.4  | 296   | Pantanal           | 1969-2014 | 1987- 1992                     |
| São José do Sepotuba                  | Sepotuba  | Paraná                   | -15.1  | -57.7  | 239   | Southwest Cerrado  | 1970-2015 | 1988-1993                      |
| Serra do Navio                        | Amapari   | North Atlantic<br>Basins | 0.9    | -52    | 352   | East Lowlands      | 1952-2015 | 1957-1972                      |
| Tocantinópolis                        | Tocantins | Tocantins/<br>Araguaia   | -6.29  | -47.39 | 4079  | Northern Cerrado   | 1955-2015 | 1956-1958, 1964                |
| Tucuruí                               | Tocantins | Tocantins/<br>Araguaia   | -3.76  | -49.65 | 10752 | East Lowlands      | 1970-2015 | none                           |
| Tupiratins                            | Tocantins | Tocantins/<br>Araguaia   | -8.39  | -48.11 | 3335  | Northern Cerrado   | 1970-2015 | none                           |
| UHE Peixe Angical<br>Fazenda Barreiro | Tocantins | Tocantins/<br>Araguaia   | -12.79 | -48.24 | 922   | Central Cerrado    | 1975-2006 | none                           |
| Xambioá                               | Araguaia  | Tocantins/<br>Araguaia   | -6.41  | -48.54 | 5747  | Northern Cerrado   | 1970-2015 | none                           |

---

**table S3. Stations used in the LOR analysis.** LOR results are presented as the number of years of flow data required to be within 5 or 10% of the long-term annual maximum flow mean with varying levels of confidence from 80 to 95%. For example, 5/95 refers to the number of years of data required to be within 5% of the long-term mean with 95% confidence.

| Station Name             | River                          | Lat.<br>(deg.) | Lon.<br>(deg.) | Mean<br>Flow<br>(m <sup>3</sup> /s) | Region                   | Record<br>Length<br>(yrs) | 5/95 | 5/90 | 5/85 | 5/80 | 10/95 | 10/90 | 10/85 | 10/80 |
|--------------------------|--------------------------------|----------------|----------------|-------------------------------------|--------------------------|---------------------------|------|------|------|------|-------|-------|-------|-------|
| Acanaui                  | Rio Caquetá/<br>Japurá         | -1.82          | -66.6          | 14002                               | Northwestern<br>Lowlands | 33                        | 8    | 6    | 4    | 4    | 2     | 1     | 1     | 1     |
| Altamira                 | Rio Xingu                      | -3.21          | -52.21         | 8006                                | East Lowlands            | 35                        | 22   | 20   | 17   | 15   | 10    | 8     | 7     | 5     |
| Aruanã                   | Rio Araguaia                   | -14.91         | -51.08         | 1146                                | South Central<br>Cerrado | 41                        | 33   | 30   | 27   | 25   | 18    | 15    | 12    | 10    |
| Bandeirantes             | Rio Araguaia                   | -13.69         | -50.8          | 1429                                | Central<br>Cerrado       | 32                        | 22   | 19   | 17   | 15   | 11    | 9     | 7     | 6     |
| Barão de<br>Melgaço      | Rio Cuiabá                     | -16.2          | -56            | 383                                 | Pantanal                 | 39                        | 22   | 19   | 17   | 15   | 10    | 8     | 7     | 5     |
| Barra do<br>Bugres       | Rio Paraguai                   | -15.1          | -57.2          | 156                                 | Southwest<br>Cerrado     | 45                        | 37   | 34   | 32   | 29   | 23    | 19    | 16    | 14    |
| Boca do<br>Guariba       | Rio Aripuanã                   | -7.71          | -60.59         | 1440                                | West Central<br>Lowlands | 28                        | 13   | 11   | 9    | 8    | 4     | 3     | 2     | 2     |
| Canutama                 | Rio Purus                      | -6.54          | -64.39         | 6418                                | West Central<br>Lowlands | 36                        | 2    | 1    | 1    | 1    | 1     | 1     | 1     | 1     |
| Conceição do<br>Araguaia | Rio Araguaia                   | -8.27          | -49.26         | 5054                                | Northern<br>Cerrado      | 42                        | 35   | 32   | 29   | 27   | 20    | 16    | 14    | 12    |
| Curicuriari              | Rio Negro                      | -0.2           | -66.8          | 12536                               | Northern<br>Lowlands     | 29                        | 10   | 8    | 6    | 5    | 3     | 2     | 1     | 1     |
| Estirão da<br>Angelica   | Rio Mapuera (Rio<br>Urucurina) | -1.1           | -57.06         | 679                                 | Northern<br>Lowlands     | 23                        | 21   | 21   | 20   | 19   | 16    | 15    | 13    | 12    |
| Estirão do<br>Repouso    | Rio Javari                     | -4.34          | -70.91         | 2548                                | Northwestern<br>Lowlands | 29                        | 8    | 6    | 5    | 4    | 3     | 2     | 1     | 1     |
| Fazenda Rio<br>Branco    | Rio Branco                     | -9.89          | -62.98         | 26                                  | Southwestern<br>Lowlands | 26                        | 21   | 19   | 17   | 16   | 12    | 10    | 8     | 7     |
| Guajará-Mirim            | Rio Mamoré                     | -10.79         | -65.35         | 7997                                | Southwestern<br>Lowlands | 34                        | 20   | 17   | 14   | 13   | 8     | 6     | 5     | 4     |
| Itapéua                  | Rio Solimões/<br>Amazonas      | -4.06          | -63.03         | 86516                               | Central<br>Lowlands      | 37                        | 7    | 5    | 4    | 3    | 2     | 1     | 1     | 1     |
| Ivolândia                | Rio Claro                      | -16.51         | -51            | 35                                  | South Central<br>Cerrado | 36                        | 36   | 36   | 34   | 33   | 31    | 28    | 26    | 24    |
| Jatuarana                | Rio Solimões/<br>Amazonas      | -3.06          | -59.65         | 123816                              | Central<br>Lowlands      | 30                        | 11   | 9    | 7    | 6    | 4     | 3     | 2     | 2     |
| Lábrea                   | Rio Purus                      | -7.26          | -64.8          | 5689                                | West Central<br>Lowlands | 41                        | 3    | 2    | 1    | 1    | 1     | 1     | 1     | 1     |
| Lavandeira               | Rio Mosquito                   | -12.79         | -46.51         | 37                                  | Central<br>Cerrado       | 29                        | 29   | 28   | 27   | 26   | 25    | 23    | 21    | 20    |
| Luiz Alves               | Rio Araguaia                   | -13.21         | -50.59         | 1660                                | Central<br>Cerrado       | 33                        | 14   | 11   | 10   | 8    | 5     | 4     | 3     | 2     |

|                                            |                                     |        |        |        |                          |    |    |    |    |    |    |    |    |   |
|--------------------------------------------|-------------------------------------|--------|--------|--------|--------------------------|----|----|----|----|----|----|----|----|---|
| Manacapuru                                 | Rio Solimões/<br>Amazonas           | -3.31  | -60.61 | 101221 | Central<br>Lowlands      | 35 | 7  | 5  | 4  | 3  | 2  | 1  | 1  | 1 |
| Manicoré                                   | Rio Madeira                         | -5.82  | -61.3  | 24860  | West Central<br>Lowlands | 39 | 14 | 12 | 9  | 8  | 5  | 3  | 3  | 2 |
| Mineração<br>Ponte<br>Massangana<br>Óbidos | Rio Massangana                      | -9.76  | -63.29 | 25     | Southwestern<br>Lowlands | 24 | 18 | 17 | 15 | 14 | 10 | 9  | 7  | 6 |
| Pedras Negras                              | Rio Solimões/<br>Amazonas           | -1.92  | -55.51 | 172653 | East Lowlands            | 39 | 10 | 7  | 6  | 5  | 3  | 2  | 1  | 1 |
|                                            | Rio Guaporé                         | -12.85 | -62.9  | 864    | Southwestern<br>Lowlands | 24 | 12 | 10 | 8  | 7  | 4  | 3  | 2  | 2 |
| Porto Dos<br>Gaúchos                       | Rio Arinos                          | -11.54 | -57.42 | 733    | Southern<br>Highlands    | 33 | 18 | 15 | 13 | 11 | 6  | 5  | 4  | 3 |
| Porto Roncador                             | Rio Teles Pires<br>(Rio São Manuel) | -13.56 | -55.33 | 272    | Southern<br>Highlands    | 34 | 28 | 25 | 23 | 21 | 16 | 13 | 11 | 9 |
| Santo Antônio<br>do Leverger               | Rio Das Mortes                      | -12.29 | -50.96 | 891    | Central<br>Cerrado       | 42 | 30 | 27 | 24 | 22 | 16 | 12 | 10 | 9 |
| São Félix do<br>Araguaia                   | Rio Araguaia                        | -11.62 | -50.66 | 2748   | Central<br>Cerrado       | 33 | 23 | 20 | 18 | 17 | 12 | 10 | 8  | 6 |
| São Francisco                              | Rio Jari                            | -0.57  | -52.57 | 1055   | East Lowlands            | 37 | 27 | 24 | 22 | 20 | 14 | 11 | 9  | 8 |
| São Paulo de<br>Oliveira                   | Rio Solimões/<br>Amazonas           | -3.44  | -68.76 | 45953  | Northwestern<br>Lowlands | 36 | 7  | 6  | 4  | 3  | 2  | 1  | 1  | 1 |
| Seringal da<br>Caridade                    | Rio Purus                           | -9.04  | -68.58 | 1352   | Southwestern<br>Lowlands | 39 | 20 | 16 | 14 | 12 | 7  | 5  | 4  | 3 |
| Seringal<br>Fortaleza                      | Rio Purus                           | -7.72  | -66.99 | 3861   | West Central<br>Lowlands | 41 | 9  | 7  | 5  | 4  | 2  | 2  | 1  | 1 |
| Serrinha                                   | Rio Negro                           | -0.48  | -64.83 | 17305  | Northern<br>Lowlands     | 29 | 11 | 9  | 7  | 6  | 4  | 3  | 2  | 2 |

---

**table S4. Stations used in the IHA analysis of individual dams, with supporting information.**

| Dam Name              | Station Name                      | Distance from dam (km) | Location   | Years Pre-Impact  | Years Post-Impact | Corresponding LOR Station  | Significance Level based on LOR |
|-----------------------|-----------------------------------|------------------------|------------|-------------------|-------------------|----------------------------|---------------------------------|
| Balbina               | Cachoeira Morena                  | 33                     | downstream | 14<br>(1973-1987) | 18<br>(1991-2011) | Estirão da Angelica        | 85% CI within 10% of mean       |
| Cachoeira do Lavrinha | Ceres                             | 57                     | downstream | 37<br>(1965-2003) | 11<br>(2004-2015) | Barra do Bugres            | Below 80% CI within 10% of mean |
| Cachoeira do Lavrinha | Jaraguá                           | 54                     | upstream   | 36<br>(1965-2003) | 10<br>(2004-2015) | Ivolândia                  | Below 80% CI within 10% of mean |
| Coaracy Nunes         | Leônidas (Bambu)                  | 112                    | upstream   | 7<br>(1952-1975)  | 38<br>(1976-2014) | Estirão da Angelica        | Below 80% CI within 10% of mean |
| Coaracy Nunes         | Porto Platon                      | 34                     | upstream   | 7<br>(1952-1975)  | 38<br>(1976-2014) | São Francisco              | 80% CI within 10% of mean       |
| Coaracy Nunes         | Serra do Navio                    | 155                    | upstream   | 7<br>(1952-1975)  | 39<br>(1976-2015) | Estirão da Angelica        | Below 80% CI within 10% of mean |
| Guaporé               | Mato Grosso                       | 210                    | downstream | 24<br>(1977-2002) | 11<br>(2003-2014) | Barra do Bugres            | Below 80% CI within 10% of mean |
| Guaporé               | Pontes e Lacerda                  | 92                     | downstream | 27<br>(1972-2002) | 11<br>(2003-2014) | Barra do Bugres            | Below 80% CI within 10% of mean |
| Itiquira              | Itiquira                          | 144                    | upstream   | 30<br>(1972-2002) | 12<br>(2003-2015) | Barra do Bugres            | Below 80% CI within 10% of mean |
| Lajeado               | Fazenda Lobeira                   | 225                    | upstream   | 30<br>(1970-2001) | 11<br>(2002-2015) | Barra do Bugres            | Below 80% CI within 10% of mean |
| Lajeado               | Jacinto                           | 300                    | upstream   | 20<br>(1972-2001) | 11<br>(2002-2015) | Barra do Bugres            | Below 80% CI within 10% of mean |
| Manso                 | Fazenda Raizama (Coimbra) - F6    | 7                      | downstream | 13<br>(1982-1999) | 11<br>(2001-2015) | Barra do Bugres            | Below 80% CI within 10% of mean |
| Manso                 | Rosário Oeste                     | 128                    | downstream | 31<br>(1966-2000) | 9<br>(2001-2013)  | Barão de Melgaço           | 90% CI within 10% of mean       |
| Rio Branco            | Cachoeira do Cachimbo             | 5                      | upstream   | 10<br>(1993-2004) | 8<br>(2005-2014)  | Mineração Ponte Massangana | 85% CI within 10% of mean       |
| Santa Lúcia II        | Fazenda Tucunaré                  | 20                     | downstream | 7<br>(1995-2002)  | 11<br>(2003-2014) | Porto Roncador             | Below 80% CI within 10% of mean |
| São Domingos          | Fazenda Veneza                    | 75                     | downstream | 13<br>(1976-1989) | 20<br>(1992-2014) | Lavandeira                 | Below 80% CI within 10% of mean |
| Serra da Mesa         | AHE São Félix - Mira B / S. Félix | 60                     | downstream | 21<br>(1975-1996) | 9<br>(1997-2006)  | Santo Antônio do Leverger  | 80% CI within 10% of mean       |
| Serra da Mesa         | Fazenda Angical                   | 255                    | downstream | 21<br>(1975-1996) | 8<br>(1997-2005)  | Luiz Alves                 | 95% CI within 10% of mean       |



|               |                                       |     |            |                   |                   |                       |                           |
|---------------|---------------------------------------|-----|------------|-------------------|-------------------|-----------------------|---------------------------|
| Serra da Mesa | Peixe                                 | 290 | downstream | 25<br>(1971-1996) | 16<br>(1997-2015) | Luiz Alves            | 95% CI within 10% of mean |
| Serra da Mesa | UHE Peixe Angical<br>Fazenda Barreiro | 155 | downstream | 21<br>(1975-1996) | 9<br>(1997-2006)  | Luiz Alves            | 95% CI within 10% of mean |
| Tucuruí       | Araguatins                            | 460 | upstream   | 9<br>(1975-1984)  | 30<br>(1985-2015) | Altamira              | 90% CI within 10% of mean |
| Tucuruí       | Descarreto                            | 430 | upstream   | 25<br>(1955-1984) | 11<br>(1985-1996) | Conceição do Araguaia | 80% CI within 10% of mean |
| Tucuruí       | Itupiranga                            | 150 | upstream   | 14<br>(1970-1984) | 11<br>(1985-1996) | Altamira              | 95% CI within 10% of mean |
| Tucuruí       | Marabá                                | 190 | upstream   | 12<br>(1972-1984) | 11<br>(1985-1996) | Altamira              | 95% CI within 10% of mean |
| Tucuruí       | Tocantinópolis                        | 490 | upstream   | 25<br>(1955-1984) | 11<br>(1985-1996) | Conceição do Araguaia | 80% CI within 10% of mean |
| Tucuruí       | Tucuruí                               | 9   | downstream | 14<br>(1970-1984) | 11<br>(1985-1996) | Altamira              | 95% CI within 10% of mean |
| Tucuruí       | Xambioá                               | 600 | upstream   | 14<br>(1970-1984) | 30<br>(1985-2015) | Conceição do Araguaia | 85% CI within 10% of mean |

---

**table S5. Stations used in the IHA analysis of multiple dams in the Amazon and Paraná basins.**

| Dams                                                               | River          | Station Name         | IHA Run # (Match with # in Table S9) | Years Pre-Impact  | Years Post-Impact | Corresponding LOR Station | Significance Level based on LOR |
|--------------------------------------------------------------------|----------------|----------------------|--------------------------------------|-------------------|-------------------|---------------------------|---------------------------------|
| <b>Amazon Basin</b>                                                |                |                      |                                      |                   |                   |                           |                                 |
| Dardanelos, Faxinal I                                              | Aripuanã       | Humboldt             | 1                                    | 8<br>(1983-1996)  | 17<br>(1997-2014) | Porto Roncador            | 80% CI within 10% of mean       |
| Baurito, Garganta da Jararaca                                      | Sangue         | Fazenda Tombador     | 2                                    | 15<br>(1985-2002) | 10<br>(2003-2014) | Porto dos Gaúchos         | 90% CI within 10% of mean       |
|                                                                    | Sangue         | Fazenda Tombador     | 3                                    | 15<br>(1985-2002) | 6<br>(2008-2014)  | Porto dos Gaúchos         | 90% CI within 10% of mean       |
| <b>Paraná Basin</b>                                                |                |                      |                                      |                   |                   |                           |                                 |
| Ponte de Pedra, Aquarus, Santa Gabriela                            | Correntes      | Estrada BR-163       | 4                                    | 23<br>(1970-2005) | 9<br>(2006-2015)  | Barra do Bugres           | Below 80% CI within 10% of mean |
| Antônio Brennand, Jauru, Indiavaí, Ombreiras, Salto, Figueirópolis | Jauru          | Água Suja            | 5                                    | 17<br>(1980-2002) | 12<br>(2003-2015) | Barra do Bugres           | Below 80% CI within 10% of mean |
|                                                                    | Jauru          | Porto Esperidião     | 6                                    | 34<br>(1966-2002) | 12<br>(2003-2015) | Barra do Bugres           | Below 80% CI within 10% of mean |
| Itiquira, Ponte de Pedra, Aquarius, Santa Gabriela                 | Piquiri        | São Jerônimo         | 7                                    | 28<br>(1986-2002) | 12<br>(2003-2015) | Barão de Melgaço          | 90% CI within 10% of mean       |
|                                                                    | Piquiri        | São Jerônimo         | 8                                    | 28<br>(1986-2002) | 10<br>(2005-2015) | Barão de Melgaço          | 90% CI within 10% of mean       |
|                                                                    | Piquiri        | São José do Piquiri  | 9                                    | 27<br>(1969-2002) | 12<br>(2002-2014) | Barão de Melgaço          | 90% CI within 10% of mean       |
|                                                                    | Piquiri        | São José do Piquiri  | 10                                   | 27<br>(1969-2002) | 9<br>(2005-2014)  | Barão de Melgaço          | 90% CI within 10% of mean       |
| Juba I, Juba II, Graça Brennand, Pampeana                          | Sepotuba       | Cáceres              | 11                                   | 29<br>(1966-1995) | 19<br>(1996-2015) | Porto Roncador            | 95% CI within 10% of mean       |
|                                                                    | Sepotuba River | São José do Sepotuba | 12                                   | 19<br>(1970-1995) | 19<br>(1996-2015) | Barão de Melgaço          | 85% CI within 5% of mean        |

**table S6. Stations used in the IHA analysis of multiple dams in the Tocantins basin.**

| Combination of Dams                                                          | Station Name                    | IHA Run # (Match with # in Table S9) | Years Pre-Impact  | Years Post-Impact | Corresponding LOR Station | Significance Level based on LOR |
|------------------------------------------------------------------------------|---------------------------------|--------------------------------------|-------------------|-------------------|---------------------------|---------------------------------|
| 1. Serra da Mesa, Cana Brava                                                 | Ahe São Félix - Mira B/S. Félix | 13                                   | 21<br>(1975-1996) | 9<br>(1997-2006)  | Santo Antônio do Leverger | 80% CI within<br>10% of mean    |
|                                                                              | Fazenda Angical                 | 14                                   | 21<br>(1975-1996) | 8<br>(1997-2005)  | Luiz Alves                | 95% CI within<br>10% of mean    |
|                                                                              | Fazenda Angical                 | 15                                   | 21<br>(1975-1996) | 4<br>(2002-2006)  | Luiz Alves                | 95% CI within<br>10% of mean    |
|                                                                              | Uhe Peixe Angical               | 16                                   | 21<br>(1975-1996) | 9<br>(1997-2006)  | Luiz Alves                | 95% CI within<br>10% of mean    |
|                                                                              | Fazenda Barreiro                | 17                                   | 21<br>(1975-1996) | 4<br>(2002-2006)  | Luiz Alves                | 95% CI within<br>10% of mean    |
|                                                                              | Uhe Peixe Angical               |                                      |                   |                   |                           |                                 |
|                                                                              | Fazenda Barreiro                | 18                                   | 25<br>(1971-1996) | 9<br>(1997-2006)  | Luiz Alves                | 95% CI within<br>10% of mean    |
|                                                                              | Peixe                           |                                      |                   |                   |                           |                                 |
| 2. Serra da Mesa, Cana Brava, Lajeado                                        | Porto Nacional                  | 19                                   | 52<br>(1931-1995) | 10<br>(1997-2007) | São Félix do Araguaia     | 90% CI within<br>10% of mean    |
| 3. Serra da Mesa, Cana Brava, Lajeado, Peixe Angical, São Salvador           | Peixe                           | 20                                   | 25<br>(1971-1996) | 15<br>(1997-2014) | Luiz Alves                | 95% CI within<br>10% of mean    |
|                                                                              | Peixe                           | 21                                   | 25<br>(1971-1996) | 6<br>(2009-2015)  | Luiz Alves                | 95% CI within<br>10% of mean    |
| 4. Serra da Mesa, Cana Brava, Lajeado, Peixe Angical, São Salvador, Estreito | Carolina                        | 22                                   | 34<br>(1962-1996) | 14<br>(1997-2011) | São Félix do Araguaia     | 90% CI within<br>10% of mean    |
|                                                                              | Carolina                        | 23                                   | 34<br>(1962-1996) | 9<br>(2002-2011)  | São Félix do Araguaia     | 90% CI within<br>10% of mean    |
|                                                                              | Descarreto                      | 24                                   | 37<br>(1955-1996) | 18<br>(1997-2015) | São Félix do Araguaia     | 90% CI within<br>10% of mean    |
|                                                                              | Descarreto                      | 25                                   | 37<br>(1955-1996) | 13<br>(2002-2015) | São Félix do Araguaia     | 90% CI within<br>10% of mean    |
|                                                                              | Miracema Do Tocantins           | 26                                   | 26<br>(1970-1996) | 18<br>(1997-2015) | São Félix do Araguaia     | 90% CI within<br>10% of mean    |
|                                                                              | Miracema Do Tocantins           | 27                                   | 26<br>(1970-1996) | 13<br>(2002-2015) | São Félix do Araguaia     | 90% CI within<br>10% of mean    |
|                                                                              | Tocantinópolis                  | 28                                   | 37<br>(1955-1996) | 18<br>(1997-2015) | Conceição do Araguaia     | 95% CI within<br>10% of mean    |
|                                                                              | Tocantinópolis                  | 29                                   | 37<br>(1955-1996) | 13<br>(2002-2015) | Conceição do Araguaia     | 95% CI within<br>10% of mean    |

|                                                                                       |                |    |                   |                   |                          |                              |
|---------------------------------------------------------------------------------------|----------------|----|-------------------|-------------------|--------------------------|------------------------------|
|                                                                                       | Tupiratins     | 30 | 26<br>(1970-1996) | 18<br>(1997-2015) | Conceição do<br>Araguaia | 95% CI within<br>10% of mean |
|                                                                                       | Tupiratins     | 31 | 26<br>(1970-1996) | 13<br>(2002-2015) | Conceição do<br>Araguaia | 95% CI within<br>10% of mean |
| 5. Tucuruí, Serra da Mesa, Cana Brava, Lajeado, Peixe Angical, São Salvador, Estreito | Descarreto     | 32 | 25<br>(1955-1984) | 30<br>(1985-2015) | Altamira                 | 95% CI within<br>10% of mean |
|                                                                                       | Descarreto     | 33 | 25<br>(1955-1984) | 17<br>(1985-2002) | Altamira                 | 95% CI within<br>10% of mean |
|                                                                                       | Descarreto     | 34 | 25<br>(1955-1984) | 13<br>(2002-2015) | Altamira                 | 95% CI within<br>10% of mean |
|                                                                                       | Itupiranga     | 35 | 14<br>(1970-1984) | 30<br>(1985-2015) | Altamira                 | 95% CI within<br>10% of mean |
|                                                                                       | Itupiranga     | 36 | 14<br>(1970-1984) | 16<br>(1985-2001) | Altamira                 | 95% CI within<br>10% of mean |
|                                                                                       | Itupiranga     | 37 | 14<br>(1970-1984) | 13<br>(2002-2015) | Altamira                 | 95% CI within<br>10% of mean |
|                                                                                       | Marabá         | 38 | 12<br>(1972-1984) | 28<br>(1985-2015) | Altamira                 | 95% CI within<br>10% of mean |
|                                                                                       | Marabá         | 39 | 12<br>(1972-1984) | 16<br>(1985-2001) | Altamira                 | 95% CI within<br>10% of mean |
|                                                                                       | Marabá         | 40 | 12<br>(1972-1984) | 11<br>(2002-2015) | Altamira                 | 95% CI within<br>10% of mean |
|                                                                                       | Tocantinópolis | 41 | 25<br>(1955-1984) | 30<br>(1985-2015) | Conceição do<br>Araguaia | 95% CI within<br>10% of mean |
|                                                                                       | Tocantinópolis | 42 | 25<br>(1955-1984) | 16<br>(1985-2001) | Conceição do<br>Araguaia | 95% CI within<br>10% of mean |
|                                                                                       | Tocantinópolis | 43 | 25<br>(1955-1984) | 13<br>(2002-2015) | Conceição do<br>Araguaia | 80% CI within<br>10% of mean |
|                                                                                       | Tucuruí        | 44 | 14<br>(1970-1984) | 30<br>(1985-2015) | Conceição do<br>Araguaia | 95% CI within<br>10% of mean |
|                                                                                       | Tucuruí        | 45 | 14<br>(1970-1984) | 16<br>(1985-2001) | Conceição do<br>Araguaia | 95% CI within<br>10% of mean |
|                                                                                       | Tucuruí        | 46 | 14<br>(1970-1984) | 13<br>(2002-2015) | Conceição do<br>Araguaia | 80% CI within<br>10% of mean |

**table S7. IHA results for streamflow stations in the individual dams analysis.**

| Dam Name              | Station Name                       | Overall HA | Group 1 | Group 2 | Group 3 | Group 4 | Group 5 |
|-----------------------|------------------------------------|------------|---------|---------|---------|---------|---------|
| Balbina               | Cachoeira Morena                   | 108        | 96      | 96      | 41      | 133     | 211     |
| Cachoeira do Lavrinha | Ceres                              | 17         | 12      | 17      | 1       | 36      | 19      |
| Cachoeira do Lavrinha | Jaraguá                            | 19         | 8       | 11      | 2       | 85      | 19      |
| Coaracy Nunes         | Leônidas (Bambu)                   | 33         | 32      | 52      | 3       | 15      | 12      |
| Coaracy Nunes         | Porto Platon                       | 17         | 18      | 21      | 2       | 22      | 10      |
| Coaracy Nunes         | Serra do Navio                     | 17         | 12      | 22      | 4       | 24      | 22      |
| Guaporé               | Mato Grosso                        | 40         | 79      | 7       | 49      | 24      | 25      |
| Guaporé               | Pontes e Lacerda                   | 24         | 25      | 7       | 34      | 69      | 11      |
| Itiquira              | Itiquira                           | 15         | 7       | 10      | 9       | 48      | 24      |
| Lajeado               | Fazenda Lobeira                    | 30         | 24      | 26      | 6       | 80      | 20      |
| Lajeado               | Jacinto                            | 40         | 38      | 48      | 8       | 60      | 14      |
| Manso                 | Fazenda Raizama (Coimbra) - F6     | 62         | 46      | 59      | 52      | 131     | 49      |
| Manso                 | Rosário Oeste                      | 34         | 28      | 41      | 1       | 52      | 26      |
| Rio Branco            | Cachoeira do Cachimbo              | 17         | 24      | 13      | 7       | 14      | 13      |
| Santa Lúcia II        | Fazenda Tucunaré                   | 16         | 10      | 8       | 4       | 55      | 30      |
| São Domingos          | Fazenda Veneza                     | 27         | 13      | 20      | 13      | 78      | 50      |
| Serra da Mesa         | AHE São Félix - Mira B/S. Félix    | 48         | 55      | 42      | 16      | 50      | 67      |
| Serra da Mesa         | Fazenda Angical                    | 37         | 28      | 30      | 7       | 72      | 75      |
| Serra da Mesa         | Peixe                              | 48         | 31      | 35      | 12      | 129     | 82      |
| Serra da Mesa         | UHE Peixe Angical Fazenda Barreiro | 45         | 49      | 41      | 16      | 47      | 55      |
| Tucuruí               | Araguatins                         | 13         | 13      | 12      | 2       | 15      | 20      |
| Tucuruí               | Descarreto                         | 9          | 8       | 10      | 1       | 10      | 16      |
| Tucuruí               | Itupiranga                         | 25         | 31      | 24      | 9       | 30      | 13      |
| Tucuruí               | Marabá                             | 10         | 10      | 11      | 4       | 5       | 14      |
| Tucuruí               | Tocantinópolis                     | 10         | 8       | 10      | 1       | 21      | 6       |
| Tucuruí               | Tucuruí                            | 39         | 16      | 44      | 3       | 84      | 76      |
| Tucuruí               | Xambioá                            | 9          | 7       | 11      | 1       | 10      | 11      |

**table S8. IHA results for streamflow stations in the multiple dams analysis.**

| IHA Run # (match with # in Tables S5 and S6) | Overall HA | Group 1 | Group 2 | Group 3 | Group 4 | Group 5 |
|----------------------------------------------|------------|---------|---------|---------|---------|---------|
| 1                                            | 13         | 9       | 6       | 4       | 49      | 8       |
| 2                                            | 9          | 5       | 7       | 11      | 34      | 5       |
| 3                                            | 11         | 5       | 7       | 11      | 40      | 10      |
| 4                                            | 108        | 82      | 69      | 13      | 369     | 70      |
| 5                                            | 29         | 13      | 18      | 4       | 69      | 90      |
| 6                                            | 30         | 4       | 11      | 16      | 122     | 92      |
| 7                                            | 12         | 8       | 6       | 1       | 36      | 21      |
| 8                                            | 19         | 10      | 6       | 5       | 82      | 24      |
| 9                                            | 18         | 18      | 9       | 7       | 43      | 25      |
| 10                                           | 20         | 21      | 10      | 7       | 45      | 26      |
| 11                                           | 19         | 21      | 13      | 2       | 49      | 3       |
| 12                                           | 21         | 7       | 6       | 9       | 115     | 16      |
| 13                                           | 48         | 55      | 42      | 16      | 50      | 67      |
| 14                                           | 44         | 34      | 40      | 8       | 85      | 63      |
| 15                                           | 46         | 36      | 46      | 9       | 94      | 49      |
| 16                                           | 45         | 49      | 41      | 16      | 47      | 55      |
| 17                                           | 48         | 52      | 44      | 11      | 64      | 57      |
| 18                                           | 37         | 30      | 32      | 4       | 69      | 69      |
| 19                                           | 41         | 30      | 41      | 28      | 30      | 108     |
| 20                                           | 48         | 31      | 35      | 12      | 129     | 82      |
| 21                                           | 62         | 36      | 39      | 16      | 185     | 117     |
| 22                                           | 34         | 13      | 24      | 13      | 113     | 66      |
| 23                                           | 51         | 15      | 25      | 12      | 223     | 87      |
| 24                                           | 36         | 13      | 17      | 5       | 153     | 61      |
| 25                                           | 40         | 13      | 19      | 3       | 179     | 69      |
| 26                                           | 44         | 23      | 25      | 16      | 122     | 110     |
| 27                                           | 48         | 24      | 26      | 16      | 140     | 123     |
| 28                                           | 41         | 14      | 22      | 7       | 159     | 81      |
| 29                                           | 46         | 15      | 24      | 7       | 174     | 104     |
| 30                                           | 36         | 17      | 29      | 5       | 86      | 91      |
| 31                                           | 46         | 17      | 31      | 4       | 151     | 110     |
| 32                                           | 23         | 8       | 15      | 2       | 85      | 41      |
| 33                                           | 10         | 8       | 12      | 2       | 8       | 18      |
| 34                                           | 43         | 12      | 21      | 3       | 180     | 87      |
| 35                                           | 15         | 26      | 9       | 8       | 8       | 7       |
| 36                                           | 20         | 28      | 18      | 9       | 17      | 10      |
| 37                                           | 17         | 28      | 9       | 8       | 10      | 18      |
| 38                                           | 8          | 9       | 10      | 5       | 2       | 10      |
| 39                                           | 11         | 10      | 12      | 3       | 16      | 11      |
| 40                                           | 12         | 13      | 9       | 5       | 6       | 32      |

|    |    |    |    |   |     |     |
|----|----|----|----|---|-----|-----|
| 41 | 23 | 8  | 21 | 2 | 76  | 35  |
| 42 | 10 | 6  | 12 | 2 | 20  | 9   |
| 43 | 48 | 13 | 28 | 7 | 183 | 107 |
| 44 | 50 | 30 | 58 | 4 | 65  | 109 |
| 45 | 44 | 21 | 54 | 6 | 74  | 89  |
| 46 | 60 | 42 | 61 | 7 | 44  | 186 |

---
